# Supplementary material for: Synthesis, Quantification, and Characterization of Fatty Acid Amides from In Vitro and In Vivo Sources
Source: MDPI journal article supplement (doi:10.3390/molecules26092543), 2021-04-27
Supplement: s1 [file s1]

## Supporting Information

### Synthesis, Quantification, and Characterization of Fatty Acid Amides from *In Vitro* and *In Vivo* Sources

Ruidong Ni, Suzeeta Bhandari, Gabriela Suarez, Perry R. Mitchell, Jr., Neel B. Patel, Kara Lamb, Kirpal S. Bisht\*, and David J. Merkler\*

Department of Chemistry, University of South Florida, Tampa, FL 33620, USA

\*Correspondence: merkler@usf.edu (D.J.M.); kbisht@usf.edu (K.S.B.); Tel.: 1-813-974-3579 (D.J.M.) or 1-813-974-0350 (K.S.B.)

|                                                                                                                                               |       |            |
|-----------------------------------------------------------------------------------------------------------------------------------------------|-------|------------|
| Identification and Quantification of Fatty Acid Amides Produced by <i>Drosophila melanogaster</i> Larvae by LC/QTOF-MS                        | ----- | Page 2     |
| <sup>1</sup> H- and <sup>13</sup> C- NMR spectra of the fatty acid amides FA-1, FA-2, FA-3 and FA-4                                           | ----- | Pages 3-10 |
| The EIC peak and mass spectrum of the <i>N</i> -oleoylethanolamine standard                                                                   | ----- | Page 11    |
| Targeted MS/MS spectra of OEA in <i>T. castaneum</i> extract at 20 eV collision energy displaying expected primary fragment ion, m/z 62.0602. | ----- | Page 12    |

**Table S1.**  
**Identification and Quantification of Fatty Acid Amides**  
**Produced by *Drosophila melanogaster* Larvae by LC/QTOF-MS<sup>1</sup>**

| Fatty Acid Amide                          | Standard                         |                          | Endogenousfrom Larvae            |                          | EndogenousAmount (pmoles/gram of tissue) |
|-------------------------------------------|----------------------------------|--------------------------|----------------------------------|--------------------------|------------------------------------------|
|                                           | [M+H] <sup>+</sup><br><i>m/z</i> | RT <sup>2</sup><br>(min) | [M+H] <sup>+</sup><br><i>m/z</i> | RT <sup>2</sup><br>(min) |                                          |
| <b><i>N</i>-Acylglycines</b>              |                                  |                          |                                  |                          |                                          |
| <i>N</i> -Palmitoylglycine                | 314.2635                         | 5.968                    | 314.2524                         | 5.940                    | 19.5 ± 7.0                               |
| <i>N</i> -Oleoylglycine                   | 340.2785                         | 6.067                    | 340.2666                         | 5.874                    | 24.8 ± 12.0                              |
| <i>N</i> -Linoleoylglycine                | 338.2634                         | 5.950                    | 338.2399                         | 5.794                    | 12.1 ± 3.7                               |
| <i>N</i> -Archidonoylglycine              | 362.2630                         | 5.800                    | 362.2531                         | 5.934                    | 27.1 ± 14.7                              |
| <b><i>N</i>-Acylethanolamines</b>         |                                  |                          |                                  |                          |                                          |
| <i>N</i> -Oleylethanolamine               | 326.2998                         | 6.051                    | 326.2781                         | 6.007                    | 1.3 ± 1.5                                |
| Anandamide                                | 348.2840                         | 5.768                    | 348.2593                         | 5.641                    | 1.5 ± 0.8                                |
| <b><i>N</i>-Acyldopamines<sup>3</sup></b> |                                  |                          |                                  |                          |                                          |
| <i>N</i> -Palmitoyldopamine               | 392.3089                         | 6.117                    | 392.3356                         | 6.237                    | 3.8 ± 2.5                                |
| <i>N</i> -Oleoyldopamine                  | 418.3243                         | 6.196                    | 418.3263                         | 6.134                    | 1.9 ± 0.5                                |
| <i>N</i> -Archidonoylglycine              | 440.3271                         | 5.934                    | 440.3624                         | 5.990                    | 2.8 ± 0.6                                |
| <b><i>N</i>-Acylserotonins</b>            |                                  |                          |                                  |                          |                                          |
| <i>N</i> -Palmitoylserotonin              | 415.3245                         | 6.159                    | 415.3047                         | 6.123                    | 2.2 ± 0.9                                |
| <i>N</i> -Oleoylserotonin                 | 441.3397                         | 6.234                    | 441.3072                         | 6.217                    | 1.3 ± 0.3                                |
| <i>N</i> -Archidonoylserotonin            | 463.3319                         | 5.976                    | 463.3492                         | 6.083                    | 0.8 ± 0.4                                |
| <b>Primary Fatty Acid Amides</b>          |                                  |                          |                                  |                          |                                          |
| Palmitamide                               | 256.2587                         | 6.176                    | 256.2498                         | 6.148                    | 20.4 ± 14.9                              |
| Palmitoleamide                            | 254.2434                         | 5.830                    | 254.2322                         | 5.805                    | 19.2 ± 5.3                               |
| Oleamide                                  | 282.2741                         | 6.250                    | 282.2706                         | 6.195                    | 50.0 ± 31.3                              |
| Linoleamide                               | 280.2585                         | 5.950                    | 280.2523                         | 5.965                    | 5.1 ± 4.2                                |

<sup>1</sup>The fatty acid amides were extracted, analyzed, and quantified as described by Jeffries *et al.* [20].

<sup>2</sup>RT is retention time

<sup>3</sup>Identified and quantified as the *N*-acyldopamine quinone.

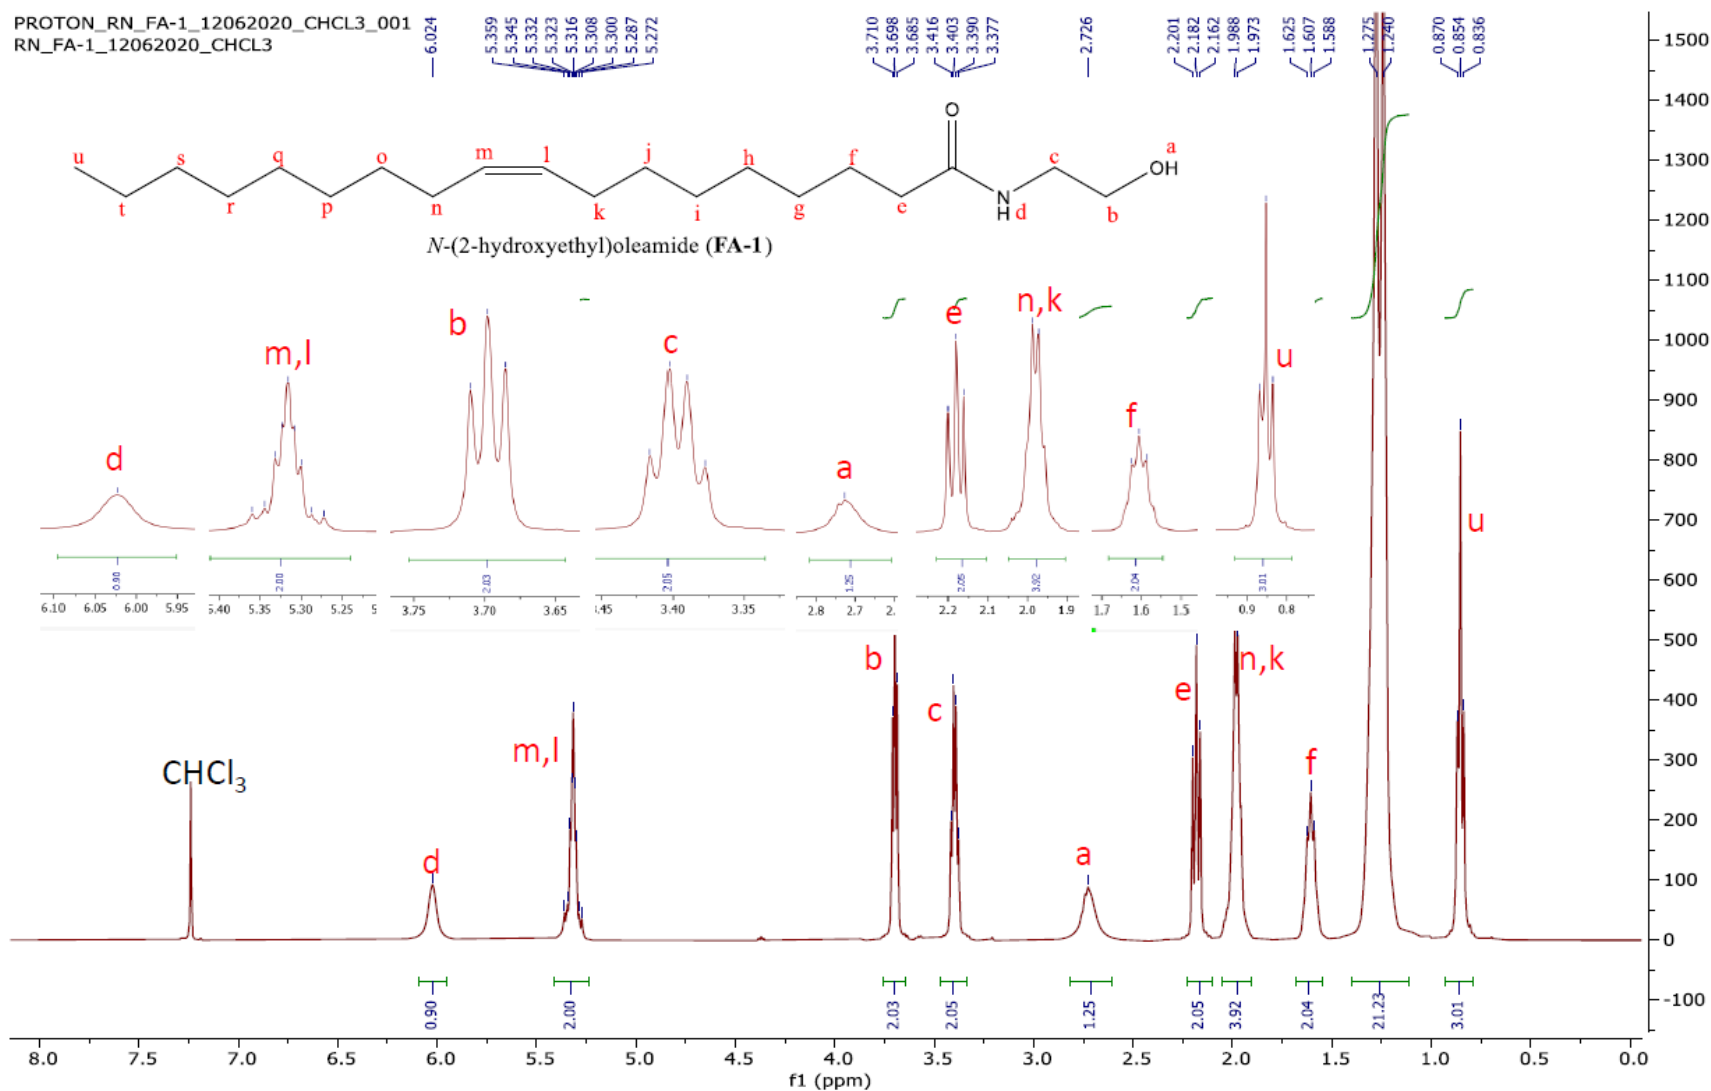

**Figure S1:** <sup>1</sup>H NMR (600 MHz, CDCl<sub>3</sub>) of FA-1, the inset shows multiplicity of the signals.

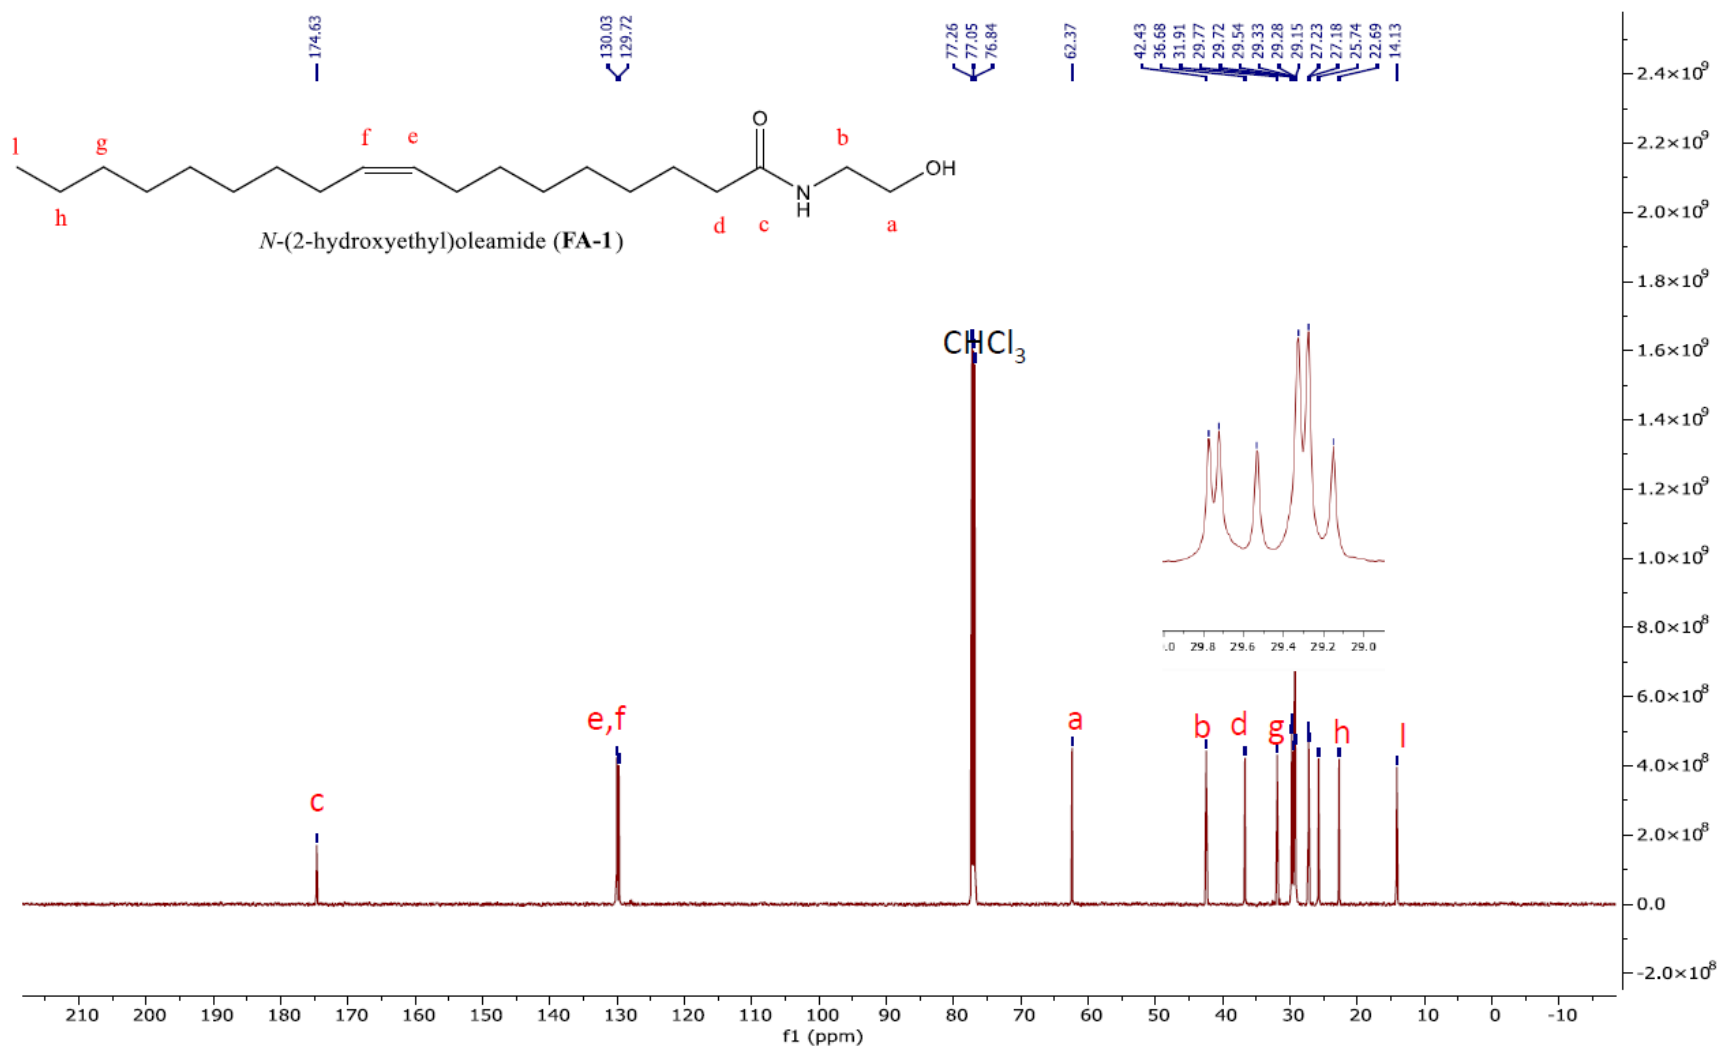

**Figure S2:** <sup>13</sup>C NMR (151 MHz, CDCl<sub>3</sub>) of **FA-1**, the inset shows clustered signals.

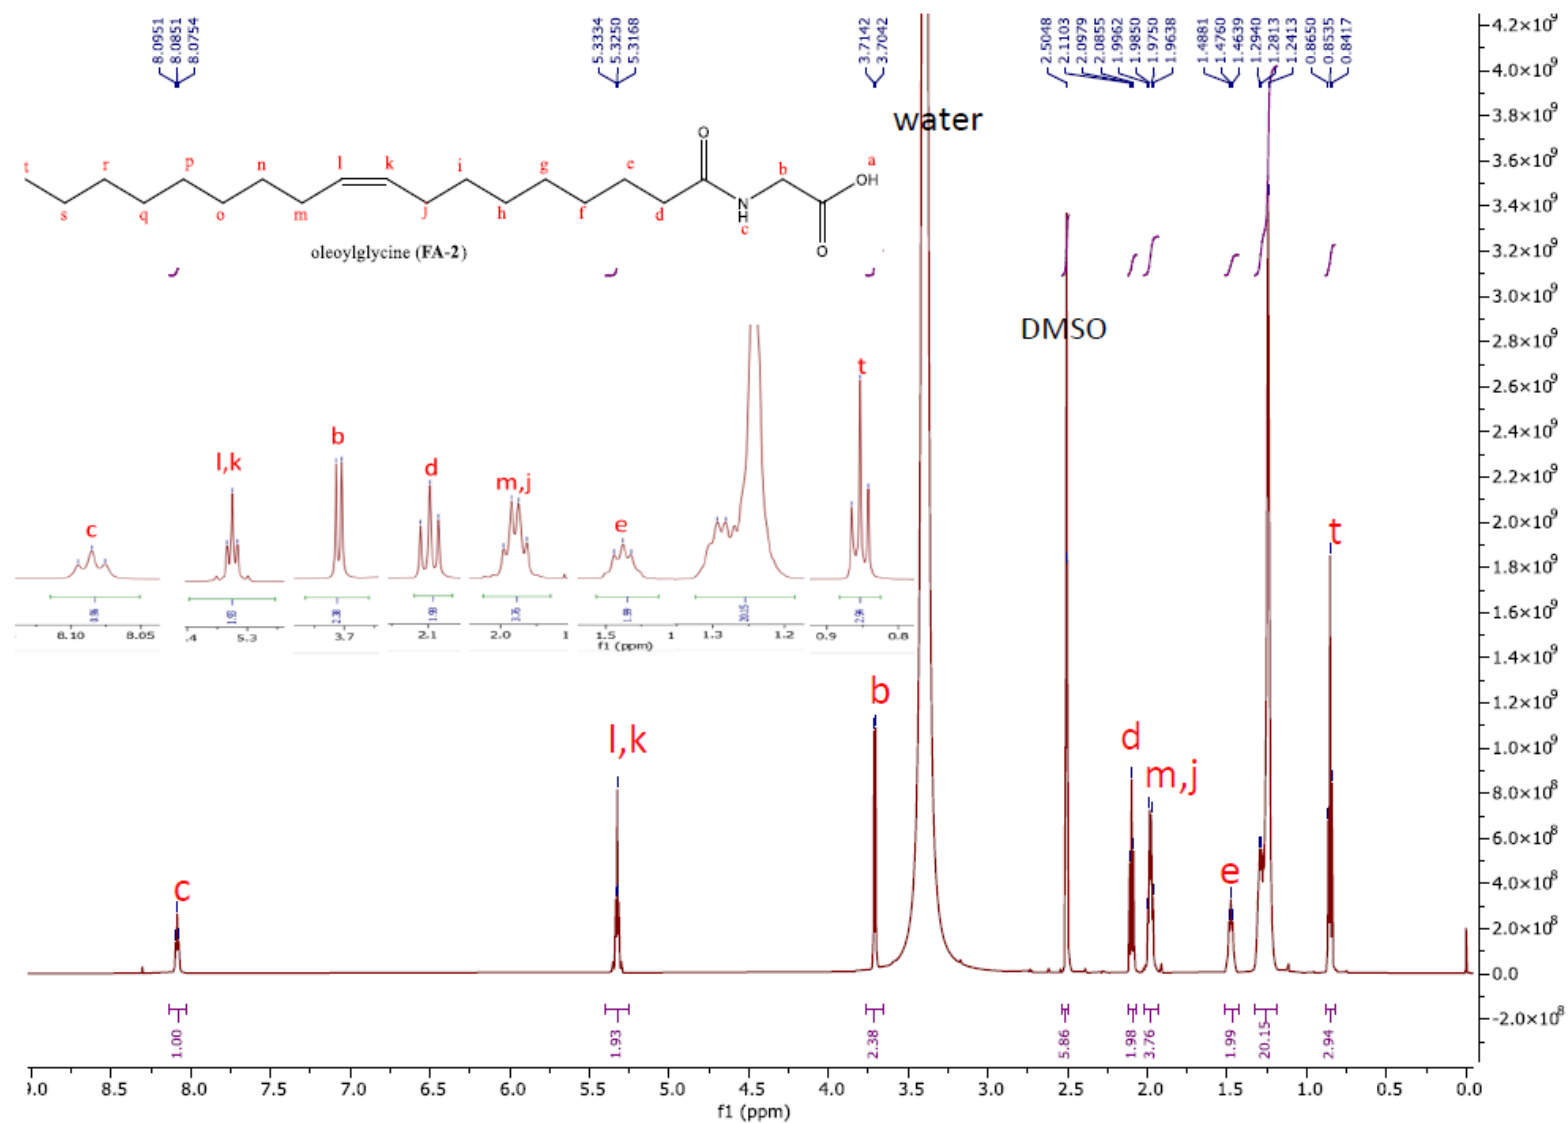

**Figure S3:**  $^1\text{H}$  NMR (600 MHz, DMSO) of **FA-2**, the inset shows multiplicity of the signals.

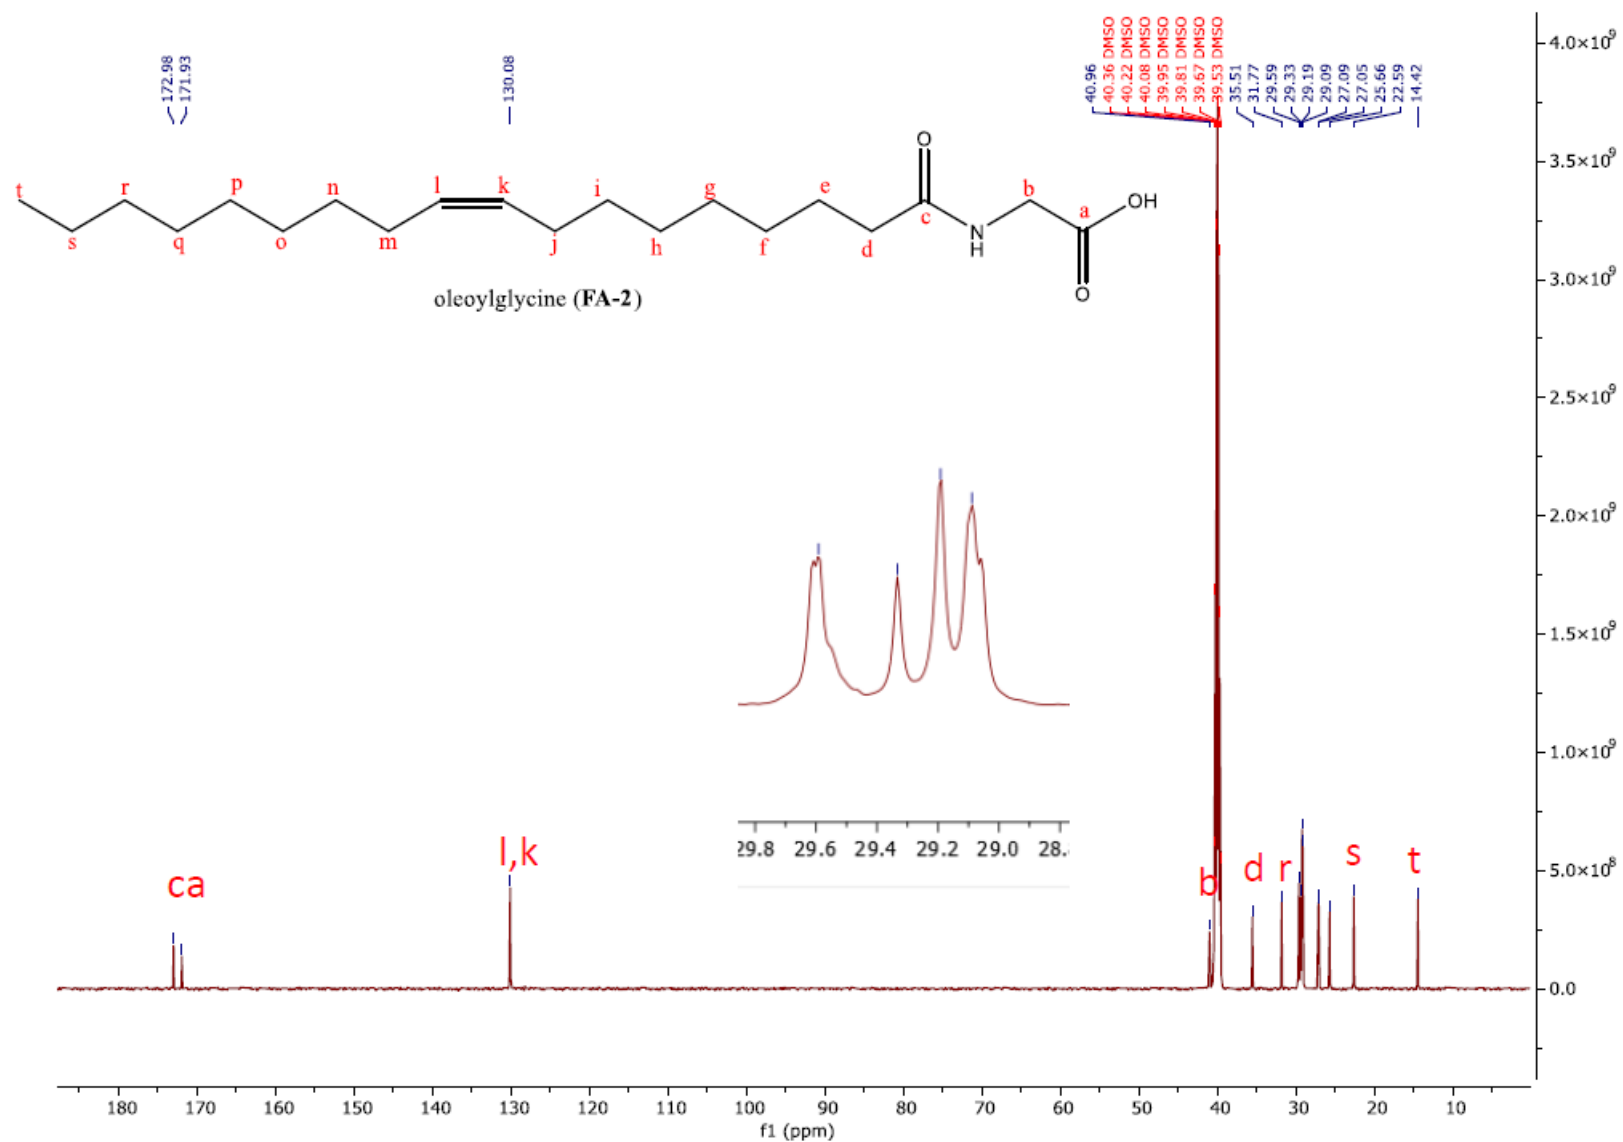

**Figure S4:**  $^{13}\text{C}$  NMR (151 MHz, DMSO) of **FA-2**, the inset shows clustered signals.

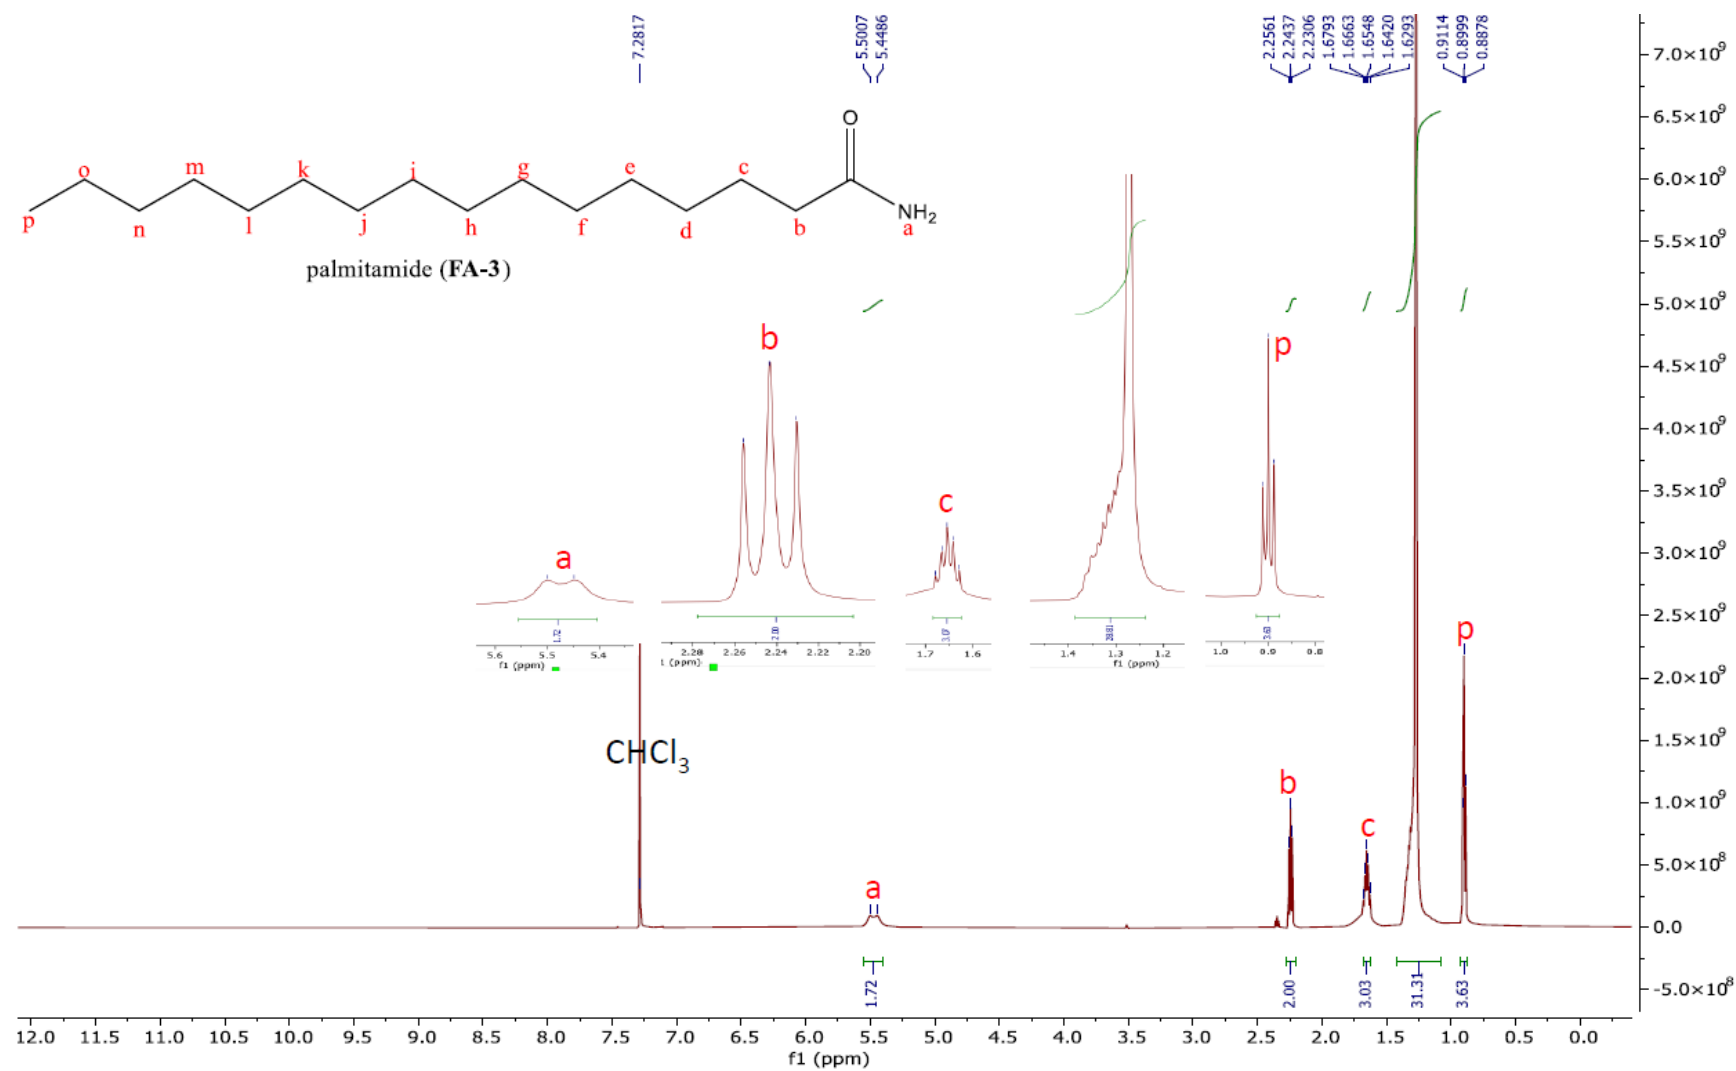

**Figure S5:** <sup>1</sup>H NMR (600 MHz, CDCl<sub>3</sub>) of **FA-3**, the inset shows multiplicity of the signals.

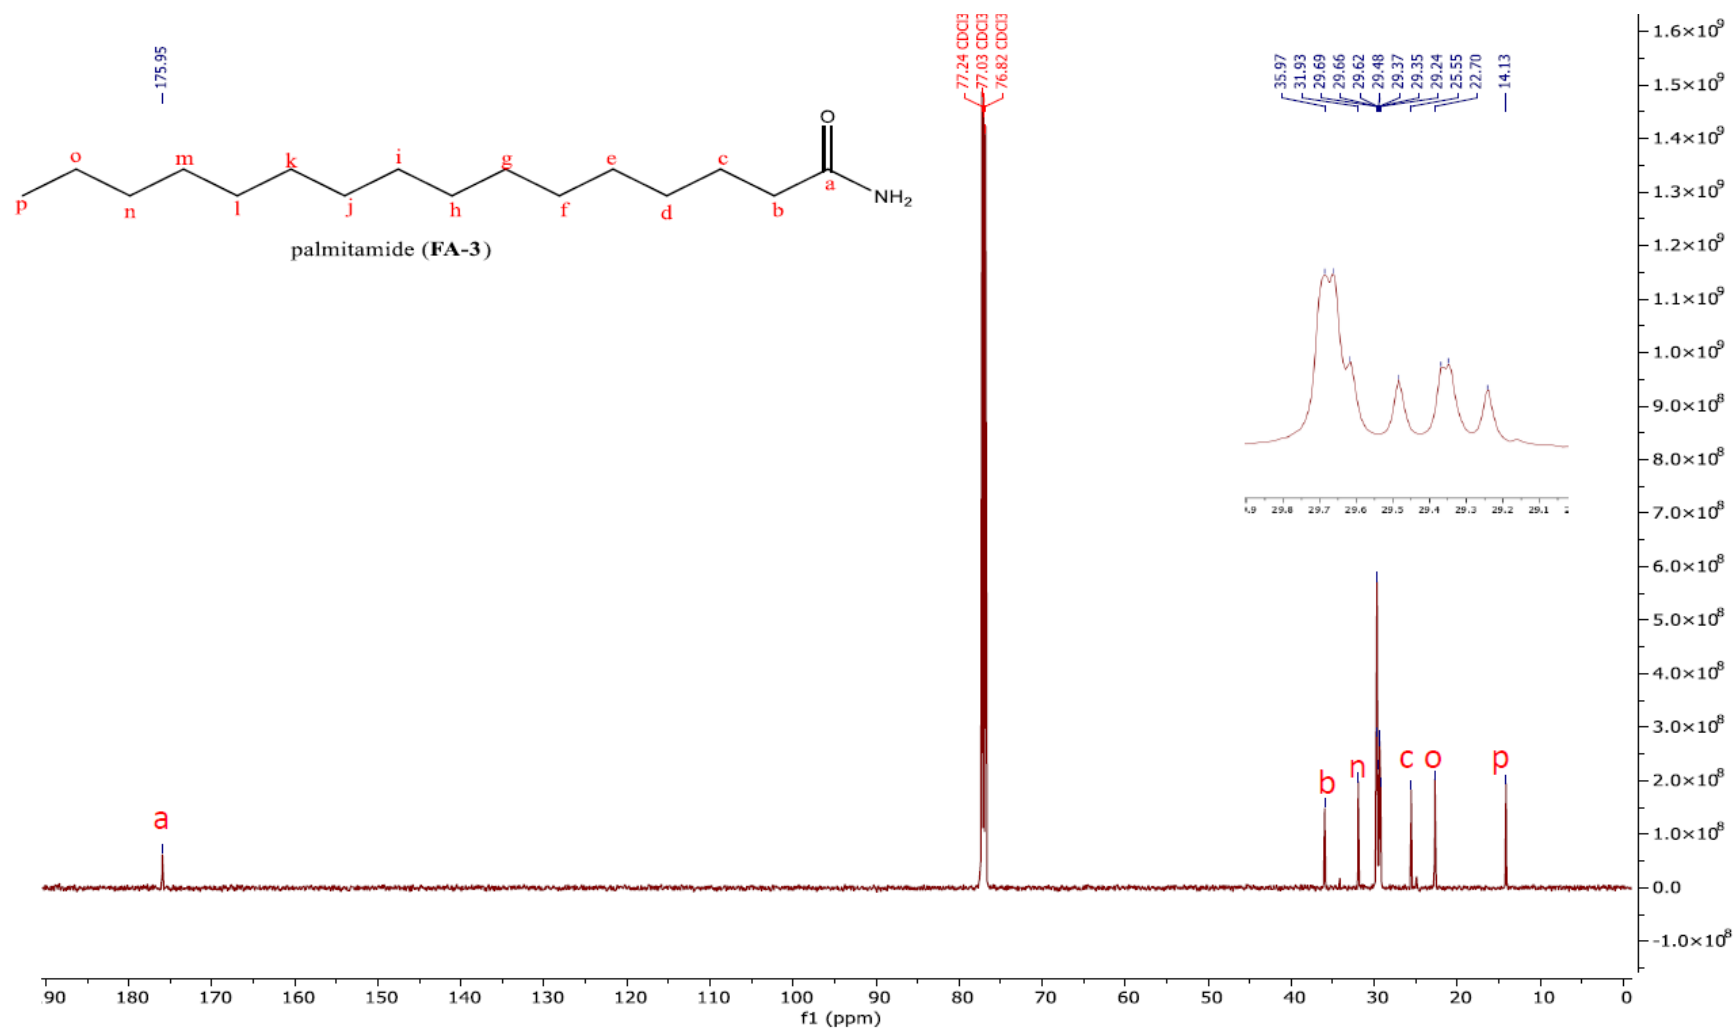

**Figure S6:**  $^{13}\text{C}$  NMR (151 MHz,  $\text{CDCl}_3$ ) of **FA-3**, the inset shows clustered signals.



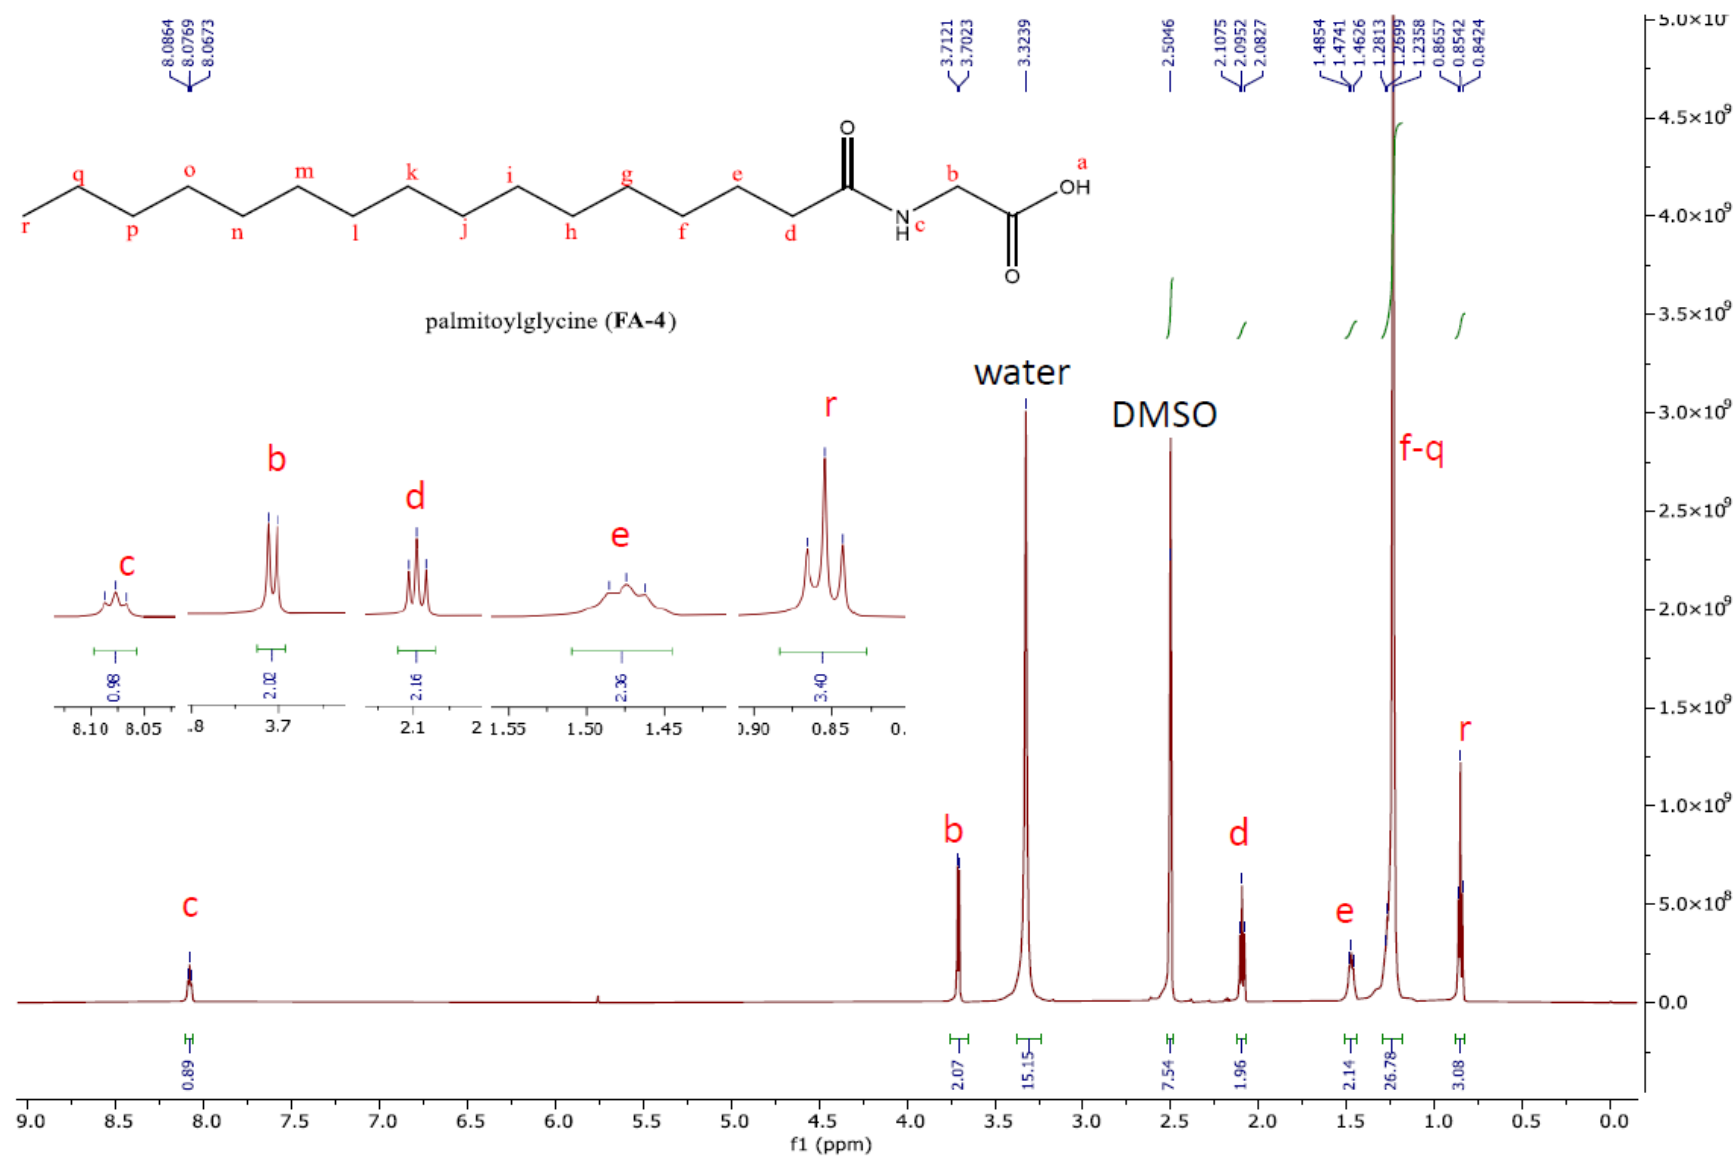

**Figure S7:**  $^1\text{H}$  NMR (600 MHz, DMSO) of **FA-4**, the inset shows multiplicity of the signals.

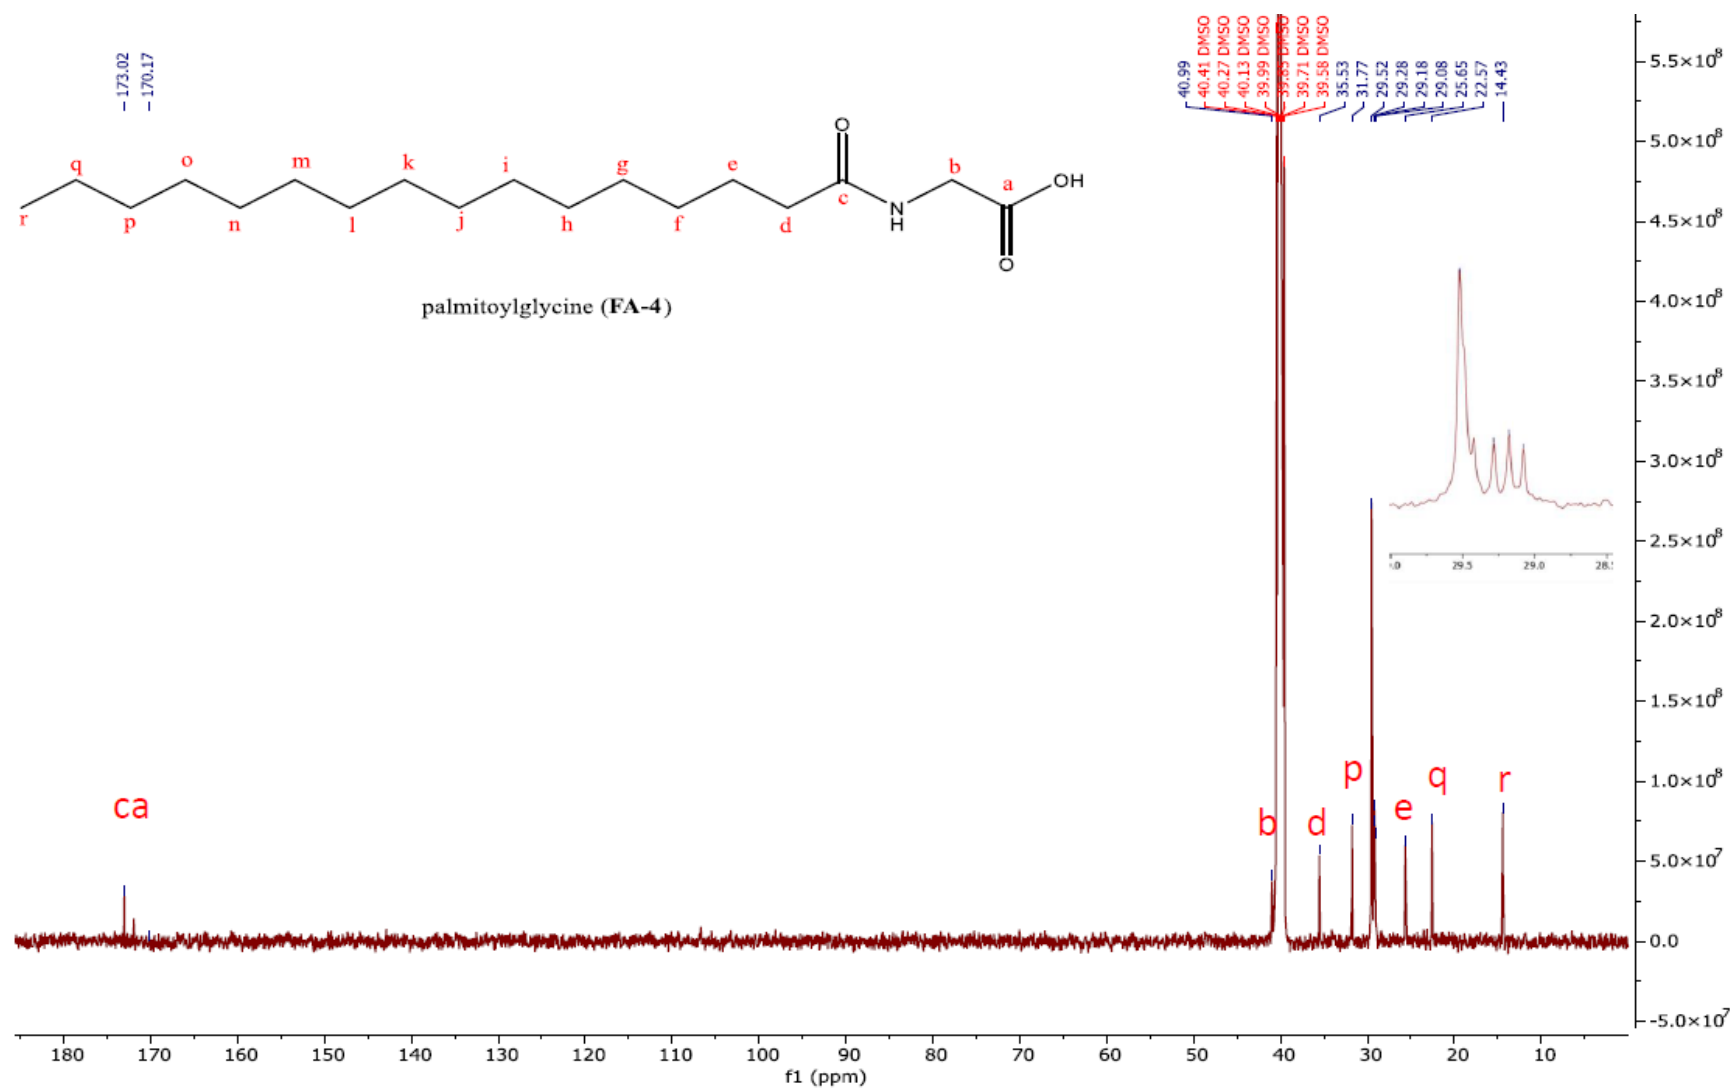

**Figure S8:**  $^{13}\text{C}$  NMR (151 MHz, DMSO) of **FA-4**, the inset shows clustered signals.

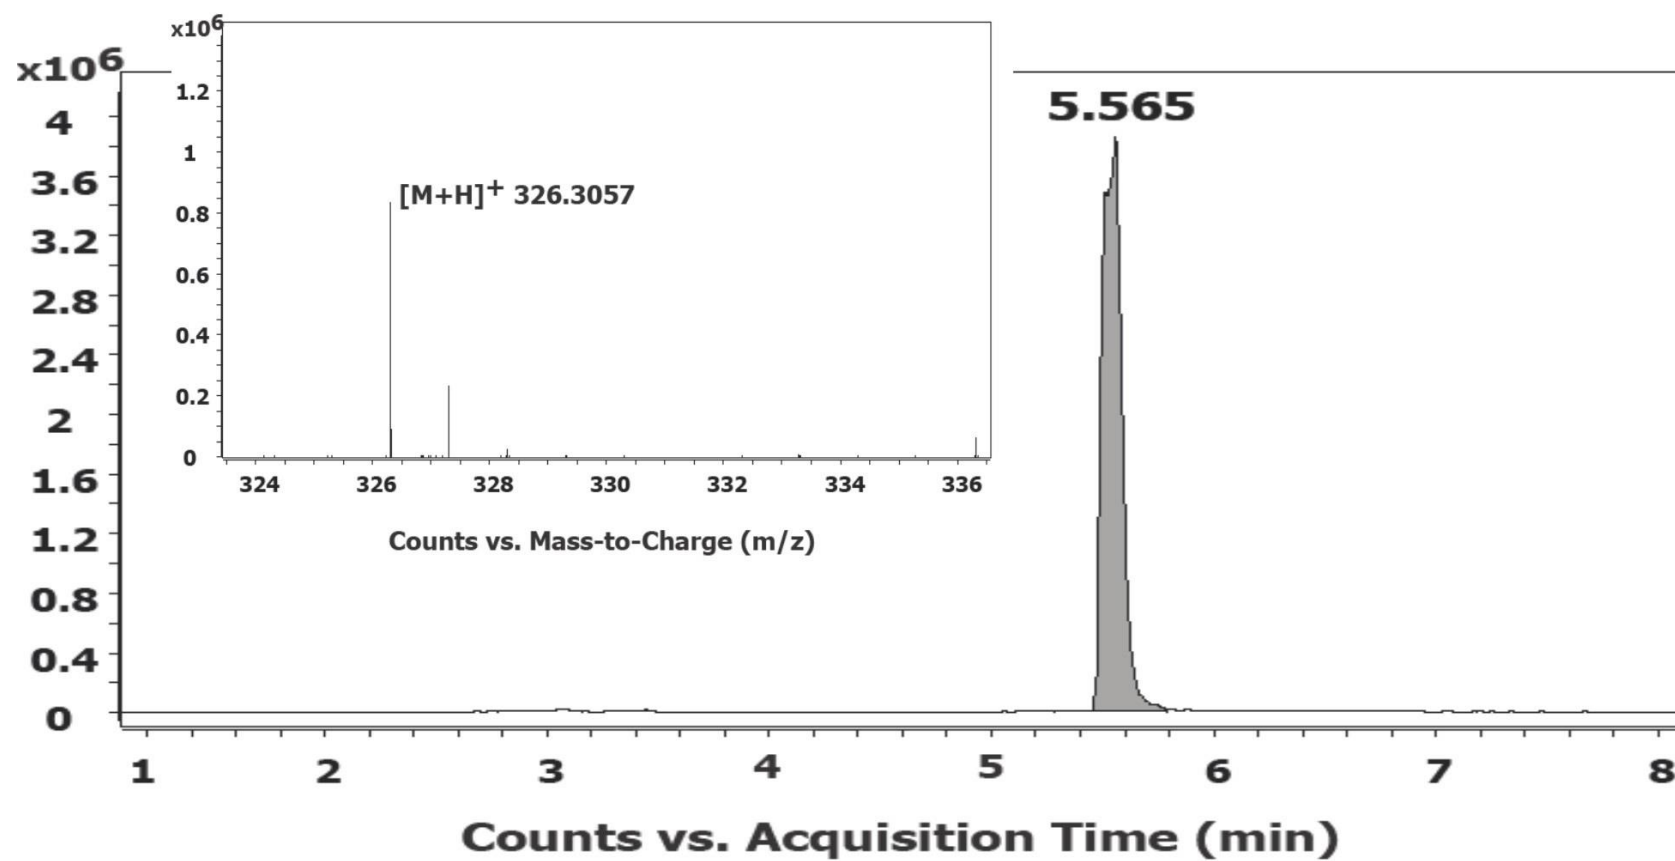

**Figure S9:** The EIC peak and mass spectrum of the *N*-oleoylethanolamine standard

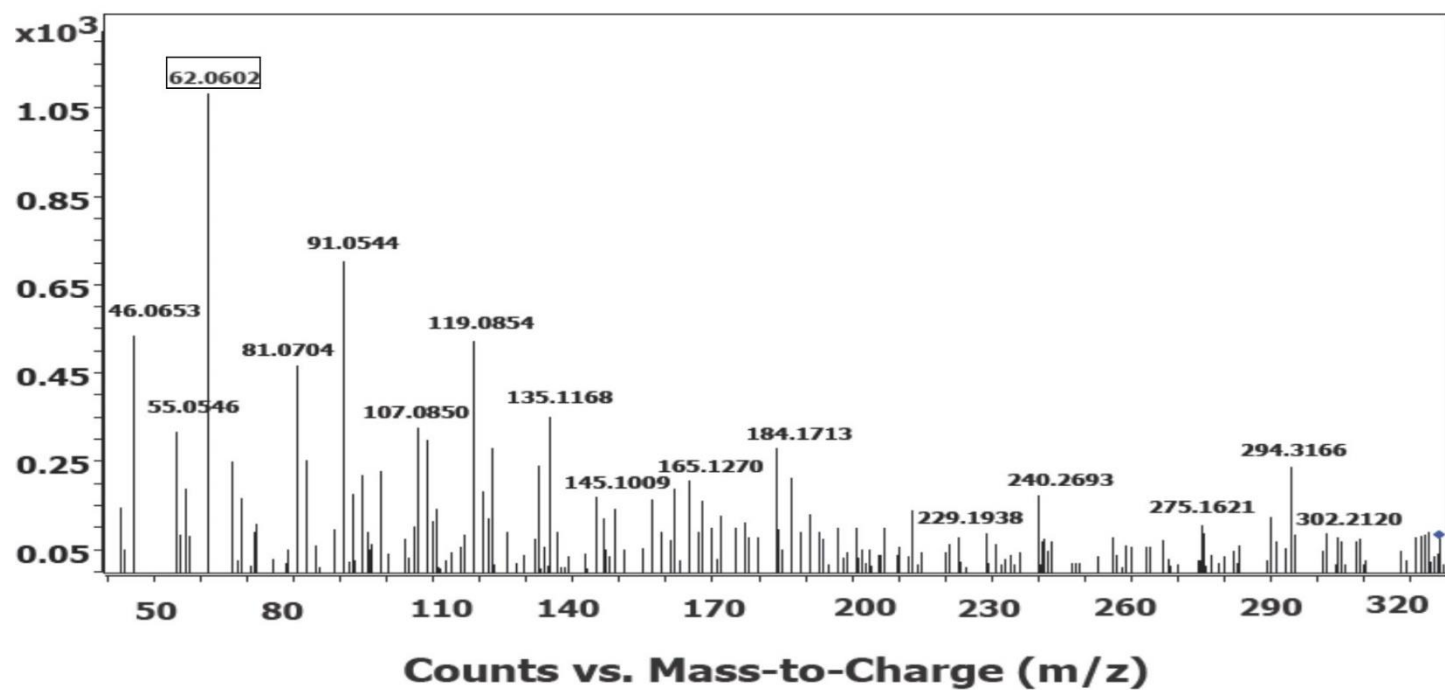

**Figure S10:** Targeted MS/MS spectra of endogenous *N*-oleoylethanolamine in the *T. castaneum* extract at 20 eV collision energy displaying expected primary fragment ion, m/z 62.0602.
